# Supplementary material for: Assessment of particle size magnifier inversion methods to obtain particle size distribution from atmospheric measurements
Source: Copernicus journal article supplement (doi:10.5194/amt-2019-465), 2020-01-20
Supplement: Supplementary file [file amt-2019-465-AC2-supplement.pdf]

## Supplementary Information

The derivation of the step-wise method is as follows:

$$\begin{aligned}\frac{dR}{ds}(s_i) &= \int_0^{+\infty} K(s_i, d_p) \times \frac{dN}{dd_p} dd_p \\ s_i \Leftrightarrow d_i : \int_0^{+\infty} K(s_i, d_p) \times dd_p &= \int_{d_i-\delta}^{d_i+\delta} K(s_i, d_p) \times dd_p, \delta \rightarrow 0 \\ \therefore \frac{dR}{dd_p}(d_i) &= \frac{dR}{ds}(s_i) \times \frac{ds}{dd_p} = \frac{ds}{dd_p} \int_0^{+\infty} K(s_i, d_p) \times \frac{dN}{dd_p} dd_p \\ &= \int_{d_i-\delta}^{d_i+\delta} K(s_i, d_p) \times \frac{dN}{dd_p} \times \frac{ds}{dd_p} \times dd_p \\ &= \frac{dN}{dd_p}(d_i) \int_{s_i-\varepsilon}^{s_i+\varepsilon} K(s_i, d_i) \times ds \\ &= \frac{dN}{dd_p}(d_i) \int_0^{+\infty} K(s_i, d_i) \times ds \\ &= \frac{dN}{dd_p}(d_i) \times \eta(d_i, s_{\max}),\end{aligned}$$

where  $d$  is the derivate symbol;  $R$  is the raw concentration;  $s$  is the saturator flow rate;  $K$  is the kernel;  $dp$  is the particle diameter;  $s_i$  and  $d_i$  are the saturator flow rate and diameter at the  $i$ th point, respectively;  $\delta$  is Cauchy's definition of the limit;  $\varepsilon$  is the error;  $s_{\max}$  is the maximum saturator flow rate;  $\eta$  is the overall detection efficiency; and  $\int$  is the integral symbol. In the stepwise method, the resolution of the kernel is assumed to be positive infinity and hence, there is a one-to-one relationship between each saturator flow rate and the retrieved particle diameter.

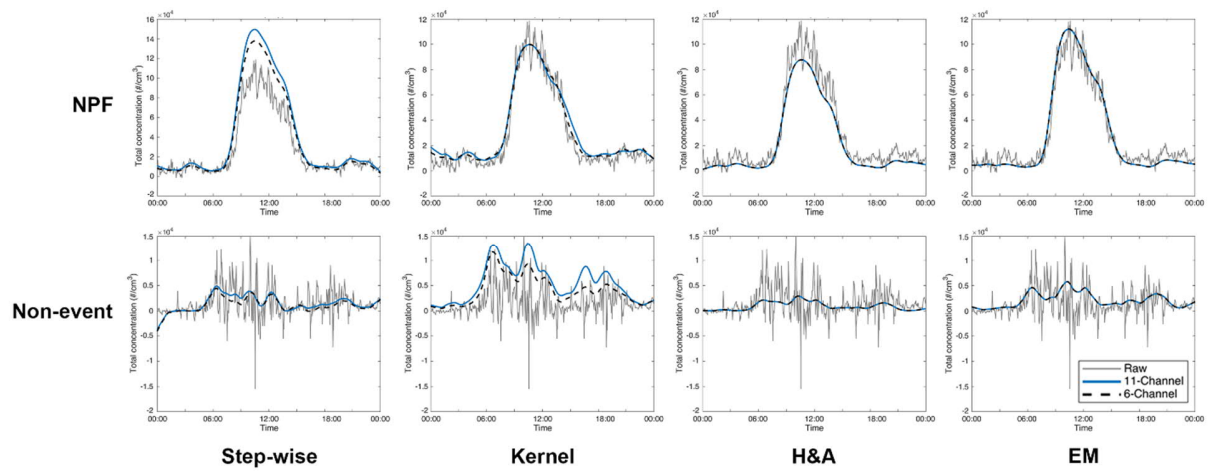

Fig. S1. Comparison of the 6- (dotted) and 11-channel (solid) size bins. The grey line indicates the raw estimation,  $R_{1.2-2.8}$  (calculated as difference between saturator flow rate at 1.3 lpm and 0.1 lpm). Top figures are during an NPF event (30 Jan.) and bottom figures are from a non-event day (6 Mar.).

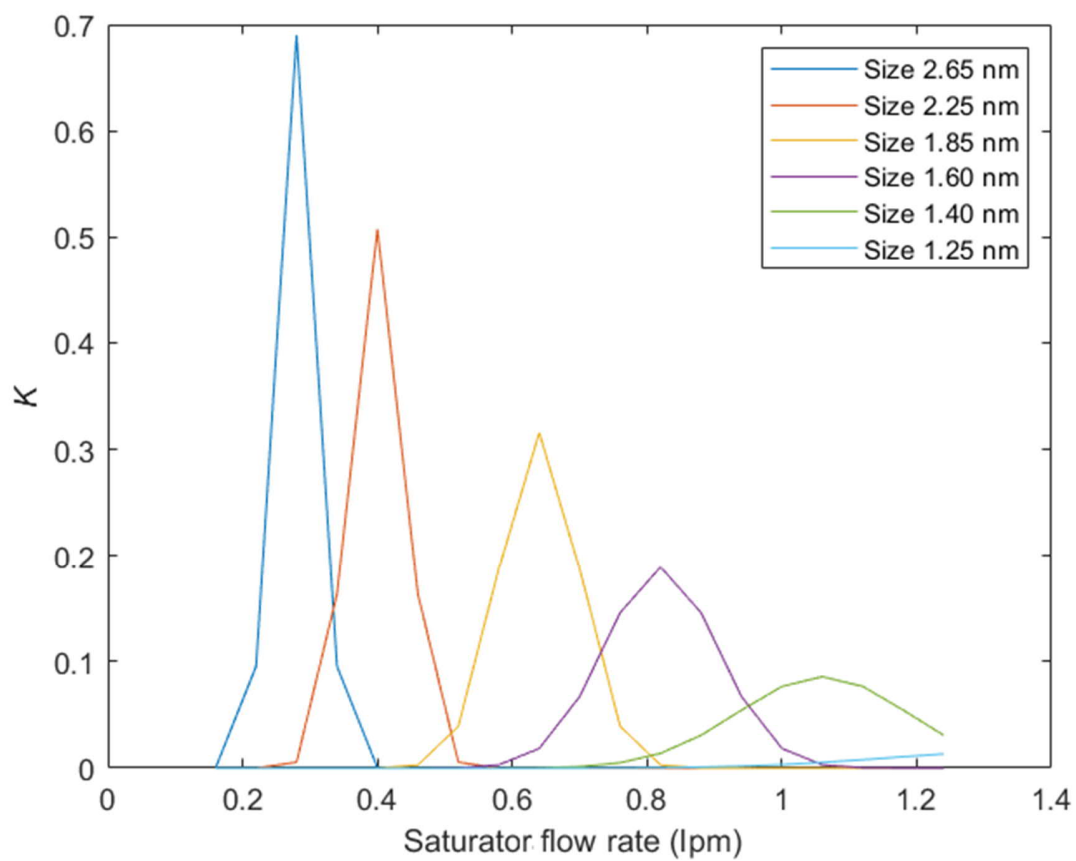

Fig. S2. Inversion kernel using 6-channels. Note that these kernels were theoretically calculated and not implicitly used for the current study.
